# Supplementary material
Source: PubMed Central journal article supplement (PMC2733738)
Supplement: ehn303_1.pdf [file ehn303_1.pdf]

Supplementary Table I. Primer and probe sequences

| Polymorphism |                   | Sequence                  |
|--------------|-------------------|---------------------------|
| rs12510359   | Gene              | PALLD                     |
|              | Forward primer    | GTTCAATATCCCAAGCCCAGAAAGA |
|              | Reverse primer    | GCTGAGTCAAAGCAGCTGAATTTG  |
|              | Probe VIC         | CCTTTAAGGATGAACTCA        |
|              | Probe FAM         | CTTTAAGGACGAACTCA         |
| rs619203     | Gene              | ROS1                      |
|              | Assay number      | C__11315168_10            |
|              | Amino acid change | C2229S                    |
| rs529038     | Gene              | ROS1                      |
|              | Assay number      | C__11315171_20            |
|              | Amino acid change | N2213D                    |
| rs1376251    | Gene              | TAS2R50                   |
|              | Assay number      | C__12107274_10            |
|              | Amino acid change | Y203C                     |
| rs1151640    | Gene              | OR13G1                    |
|              | Assay number      | C__1449414_10             |
|              | Amino acid change | I132V                     |
| rs4804611    | Gene              | ZNF627                    |
|              | Assay number      | C__25992024_20            |
| rs1010       | Gene              | VAMP8                     |
|              | Assay number      | C__2091644_20             |

|            |                   |                            |
|------------|-------------------|----------------------------|
| rs11881940 | Gene              | HNRPUL1                    |
|            | Forward primer    | GGATTACAGGCGTGAGCCA        |
|            | Reverse primer    | GGGAGAAGGTGAAGAAAAGTGGAAAT |
|            | Probe VIC         | CCTTCTGTCTATGTCTTT         |
|            | Probe FAM         | CCTTCTGTCTTTGTCTTT         |
| rs3746731  | Gene              | CD93                       |
|            | Assay number      | C__1212713_10              |
|            | Amino acid change | P541S                      |
| rs11666735 | Gene              | FCAR                       |
|            | Assay number      | C__7841642_10              |
|            | Amino acid change | D113N                      |
| rs10757274 | Gene              | Near CDKN2A/B              |
|            | Assay number      | C__26505812_10             |

Supplementary Table II. Clinical characteristics

| Clinical characteristic    | Mean ( $\pm$ SD)   |
|----------------------------|--------------------|
| Age (yrs)                  | 49.8 ( $\pm$ 13.1) |
| Sex (% men)                | 48                 |
| CHD (%)                    | 28                 |
| Smoking, ever (%)          | 73                 |
| Hypertension (%)           | 8.9                |
| Diabetes Mellitus (%)      | 5.8                |
| BMI (kg/m <sup>2</sup> )   | 25.1 ( $\pm$ 3.5)  |
| Total cholesterol (mmol/l) | 9.51 ( $\pm$ 1.98) |
| LDL cholesterol (mmol/l)   | 7.35 ( $\pm$ 1.91) |
| HDL cholesterol (mmol/l)   | 1.22 ( $\pm$ 0.36) |
| Triglycerides (mmol/l)     | 1.57 [0.36-10.81]* |

\*Median with range in brackets. BMI = body mass index, CHD = coronary heart disease, LDL = low-density lipoprotein, HDL = high-density lipoprotein.
